# Supplementary material for: Amorphous palladium-based alloy nanoparticles as highly active electrocatalysts for ethanol oxidation
Source: Royal Society of Chemistry journal article supplement (doi:10.1039/d2cc00956k), 2022-01-01
Supplement: d2cc00956k1.pdf [file d2cc00956k1.pdf]

## Electronic Supplementary Information

### Amorphous Palladium-Based Nanoparticles as Highly Active Electrocatalysts for Ethanol Oxidation

Yufeng Zhang<sup>a</sup>, Jinjie Fang<sup>a</sup>, Lipeng Zhang<sup>a</sup>, Dong Wei<sup>a</sup>, Wei Zhu<sup>a\*</sup>, Zhongbin Zhuang<sup>a,b\*</sup>

<sup>a</sup>. *State Key Lab of Organic-Inorganic Composites and Beijing Advanced Innovation Center for Soft Matter Science and Engineering, Beijing University of Chemical Technology, Beijing 100029, China.*

<sup>b</sup>. *Beijing Key Laboratory of Energy Environmental Catalysis, Beijing University of Chemical Technology, Beijing 100029, China.*

## **Chemicals.**

Ethanol (99.9%, Aladdin), oleylamine (OAm, 80-90%, Aladdin), borane tert-butylamine complex (BTB, 97%, Adamas Reagent Co. Ltd), palladium acetylacetonate ( $\text{Pd}(\text{acac})_2$ , 99%, Aladdin), potassium hydroxide (KOH, 99%, Aladdin), tri-n-octylphosphine (TOP, 90%, Aladdin). All reagents are used as received without further purification.

## **Synthesis of *a*-PdP<sub>0.1</sub> nanoparticles.**

8 mL of OAm and 0.04 mmol of  $\text{Pd}(\text{acac})_2$  were mixed together in a three flask and heated to 60 °C under  $\text{N}_2$ . After stirring evenly, 0.8 mL of TOP was injected and stirred for 10 min. Then, it was heated to 300 °C and kept at this temperature for 80 min. The product was collected by ethanol wash and centrifugation, and finally dispersed in cyclohexane.

## **Synthesis of *c*-Pd nanoparticles.**

8 mL of OAm and 0.04 mmol of  $\text{Pd}(\text{acac})_2$  were mixed together in a three flask and heated to 120 °C under  $\text{N}_2$ . After stirring evenly, 40 mg of BTB dissolved in 1 mL of OAm was injected. After 60 min of reaction, the product was collected by ethanol wash and centrifugation, and finally dispersed in cyclohexane.

## **Loading the nanoparticles on carbon.**

16.6 mg of carbon (Vulcan XC-72, Carbot Co) was dissolved in 20 mL of cyclohexane and stirred evenly under ultrasonic condition. Then, 2 mL of the synthesized nanoparticle cyclohexane dispersion, containing approximately 4.2 mg of nanoparticles, was added to the suspension. After 1 h of ultrasound and 24 h of stirring, it was dried at 60 °C.

## **Physical Characterizations.**

The X-ray powder diffraction (XRD) patterns were obtained on a Rigaku D/Max 2500 VB2+/PC X-ray powder diffractometer equipped with Cu  $K\alpha$  radiation ( $\lambda = 0.154$  nm) operating at 40 kV and 40 mA at a scanning rate of  $10^\circ \text{ min}^{-1}$ . The transmission electron microscopy (TEM) images were acquired on a JEOL JEM-1230 transmission electron microscope. High-resolution TEM (HRTEM) and energy-dispersive X-ray spectroscopy (EDS) were performed on a Talos F200X transmission electron

microscope. The XPS spectra were recorded on a Thermo Fisher ESCALAB 250Xi XPS system with a monochromatic Al K $\alpha$  X-ray source. The binding energies derived from XPS measurements were calibrated to the C 1s at 284.8 eV. The elemental analyses were done by a Thermo-Fisher ICAP 6300 Radial inductively coupled plasma optical emission spectroscopy (ICP-OES) instrument.

### **Electrochemical tests.**

The electrochemical tests were carried out in a three-electrode cell controlled by an electrochemical workstation (CHI 760E). A saturated calomel electrode (SCE) was used as the reference electrode, and a graphite electrode was used as the counter electrode. The catalysts ink were drop-casting on a glassy carbon electrode and used as the working electrode. The catalyst ink was prepared by dispersing 2 mg of catalyst in the mixed solution of isopropanol (750  $\mu$ L), water (240  $\mu$ L), and Nafion solution (20  $\mu$ L, Alfa Aesar, 5 wt%). 9  $\mu$ L of the ink was dropped onto a glassy carbon electrode (5 mm in diameter, PINE instruments). The Pd loadings were controlled as 11  $\mu$ g $\cdot$ cm $^{-2}$ . The electrolytes for the EOR reaction were 1.0 M ethanol and 1.0 M KOH.

Electrochemical active surface areas (ECSAs) of the Pd based catalysts were calculated by the equation of

$$\text{ECSA} = Q / (m \cdot C)$$

where  $Q$  is the amount of charge needed to reduce surface oxidized Pd,  $m$  is the Pd mass of catalysts on the electrode, and  $C$  is the constant of 420  $\mu$ C $\cdot$ cm $_{\text{Pd}}^{-2}$ .

ECSA of Pt/C was calculated by the charger transferred in the H $_{\text{upd}}$  region using a constant of 210  $\mu$ C cm $_{\text{Pt}}^{-2}$ .

### **Electrochemical *in-situ* FT-IR experiments.**

A Nicolet iS50 FT-IR transform infrared spectrometer equipped with a mercury cadmium telluride detector cooled with liquid nitrogen was employed in the *in-situ* electrochemical study. A calcium fluoride window and an *in-situ* EC-IR thin cell were applied in the test. The working electrode was a glassy carbon electrode (10 mm in diameter) with a catalyst loading of 50  $\mu$ g $\cdot$ cm $^{-2}$ . The SCE and Pt wire were used as reference electrode and counter electrode, respectively. The working electrode was pressed onto the calcium fluoride window with a gap less than 10  $\mu$ m when collecting

IR spectrum. The electrolyte was 0.1 M KOH with 1.0 M ethanol. The reference spectrum was collected at 0.1 V. The spectrum at each potential was normalized by the reference spectrum as follows:

$$\Delta R/R = (R(ES) - R(ER)) / (R(ER))$$

R(ER) and R(ES) were the spectrum at reference potential and tested potential, respectively.

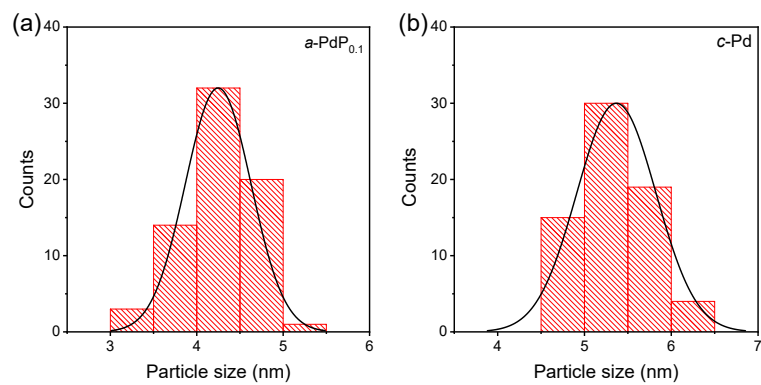

**Figure S1.** The size distribution histogram of (a) *a-PdP<sub>0.1</sub>* and (b) *c-Pd*.

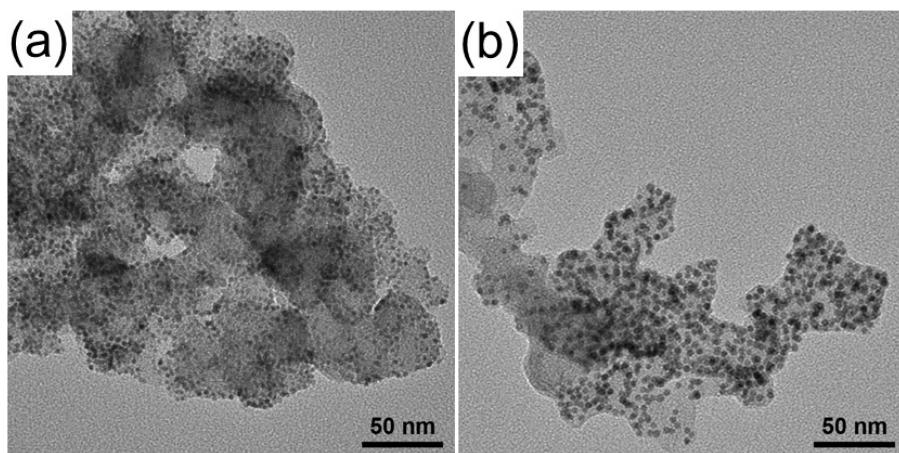

**Figure S2.** TEM image of (a)  $\alpha$ -Pd<sub>0.1</sub>/C and (b)  $c$ -Pd/C.

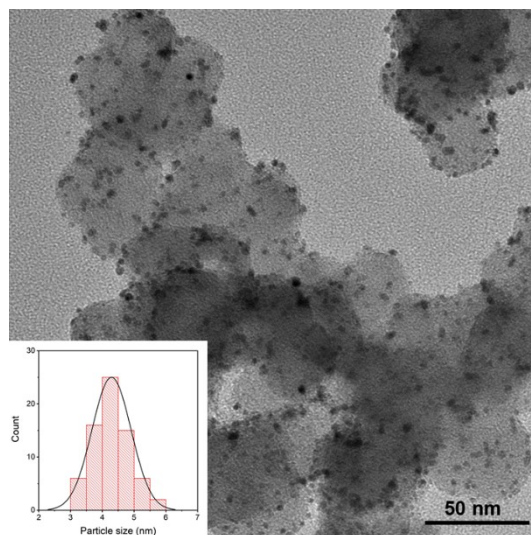

**Figure S3.** TEM image of the commercial Pt/C. Inset is the size distribution histogram of Pt.

The particle size of Pt was about 4.3 nm, which was similar to that of *a*-PdP<sub>0.1</sub> or *c*-Pd.

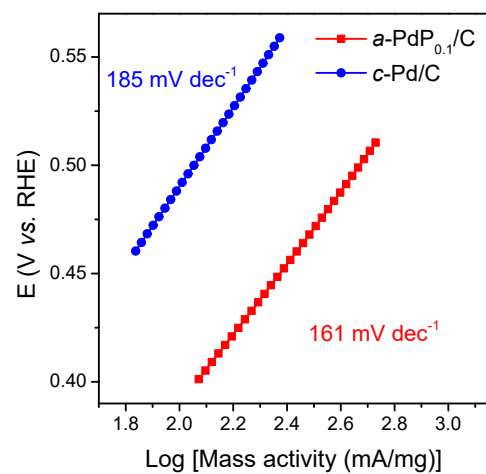

**Figure S4.** Tafel plots of  $a$ -PdP<sub>0.1</sub>/C and  $c$ -Pd/C.



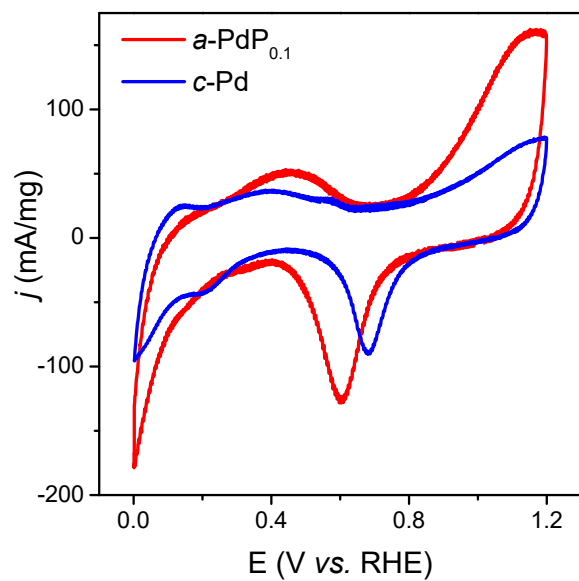

**Figure S5.** CV curves of  $a\text{-PdP}_{0.1}/\text{C}$  and  $c\text{-Pd}/\text{C}$  obtained in 1.0 M KOH at a scan rate of  $50 \text{ mV s}^{-1}$ .

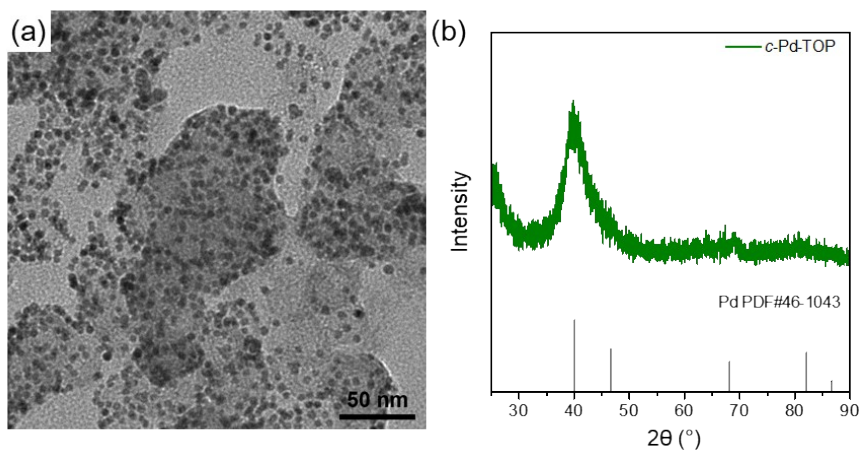

**Figure S6.** Characterization of *c*-Pd-TOP. (a) TEM image. (b) XRD pattern.

The *c*-Pd-TOP was obtained by ligand exchanging of the as-obtained *c*-Pd at 180 °C for 30 min.

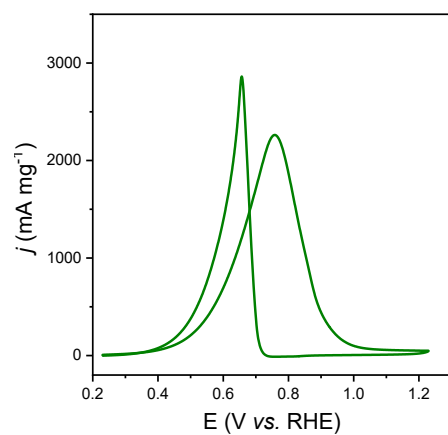

**Figure S7.** The EOR polarization curve of *c*-Pd-TOP obtained in 1.0 M KOH with 1.0 M ethanol at a scan rate of 50 mV s<sup>-1</sup>.

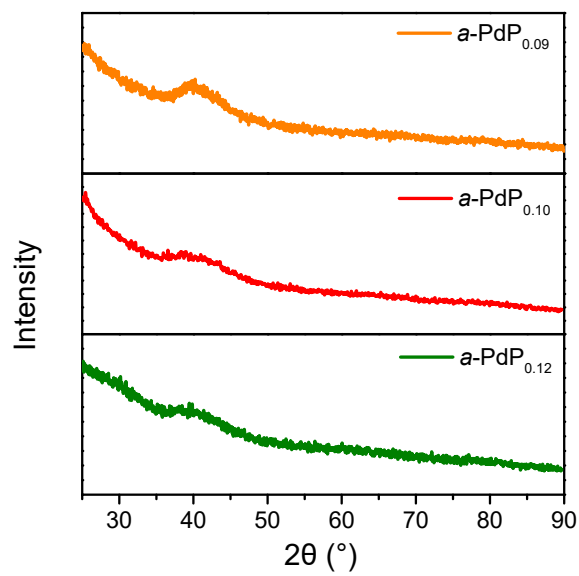

**Figure S8.** XRD patterns of the Pd-P alloy nanoparticles with different content of P.

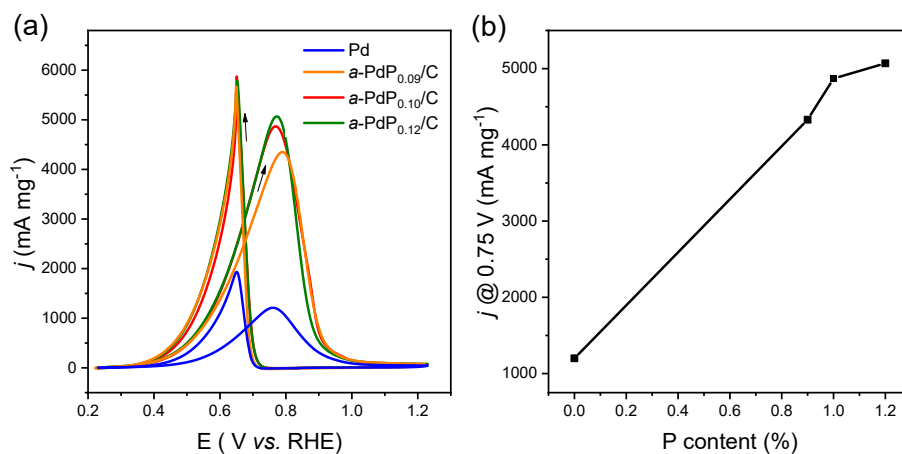

**Figure S9.** (a) The polarization curves of the Pd-P alloy nanoparticles with different content of P obtained in 1.0 M KOH with 1.0 M ethanol at a scan rate of 50 mV s<sup>-1</sup>. (b) Mass activities at 0.75 V Pd-P alloy nanoparticles with different content of P.

**Table S1.** Summary of the EOR performance of Pd-based catalysts at 0.75 V.

| Catalysts                                      | Mass activity (mA mg <sup>-1</sup> ) |           |
|------------------------------------------------|--------------------------------------|-----------|
| <i>a</i> -PdP <sub>0.1</sub>                   | 4851                                 | This work |
| <i>c</i> -Pd                                   | 1191                                 | This work |
| <i>c</i> -Pd-Ni-P@ <i>a</i> -Pd-Ni-P nanoplate | 2500                                 | 1         |
| PdP nanosheet                                  | 2300                                 | 2         |
| P doped PdNiCu                                 | 1050                                 | 3         |
| Pd@CoP NSs/CFC                                 | 1000                                 | 4         |
| Pd-Ni-P                                        | 3500                                 | 5         |
| Pd/C-N,S,P                                     | 1200                                 | 6         |
| 2D PdAg Alloy Nanodendrites                    | 1500                                 | 7         |
| Pd Nanosheets                                  | 700                                  | 8         |
| Pd/amorphous-SrRuO <sub>3</sub>                | 1300                                 | 9         |

1. P. F. Yin, M. Zhou, J. Chen, C. Tan, G. Liu, Q. Ma, Q. Yun, X. Zhang, H. Cheng, Q. Lu, B. Chen, Y. Chen, Z. Zhang, J. Huang, D. Hu, J. Wang, Q. Liu, Z. Luo, Z. Liu, Y. Ge, X. J. Wu, X. W. Du and H. Zhang, *Adv. Mater.*, 2020, **32**, e2000482.
2. H. Lv, Y. Teng, Y. Wang, D. Xu and B. Liu, *Chem. Commun.*, 2020, **56**, 15667-15670.
3. D. Chen, R.-H. Zhang, Q.-Y. Hu, Y.-F. Guo, W. Zhan, S.-N. Chen, X.-W. Zhou and Z.-X. Dai, *ACS Appl. Energy Mater.*, 2019, **2**, 5525-5533.
4. S.-H. Ye, J.-X. Feng and G.-R. Li, *ACS Catal.*, 2016, **6**, 7962-7969.
5. L. Chen, L. Lu, H. Zhu, Y. Chen, Y. Huang, Y. Li and L. Wang, *Nat. Commun.*, 2017, **8**, 14136.
6. K. Yu, Y. Lin, J. Fan, Q. Li, P. Shi, Q. Xu and Y. Min, *Catalysts*, 2019, **9**, 114.
7. W. Huang, X. Kang, C. Xu, J. Zhou, J. Deng, Y. Li and S. Cheng, *Adv. Mater.*, 2018, **30**, 1706962-1706968.
8. M. Yang, M. Pang, J. Chen, F. Gao, H. Li and P. Guo, *ACS Appl. Mater. Interfaces*, 2021, **13**, 9830-9837.
9. X. Wu, J. He, M. Zhang, Z. Liu, S. Zhang, Y. Zhao, T. Li, F. Zhang, Z. Peng, N. Cheng, J. Zhang, X. Wen, Y. Xie, H. Tian, L. Cao, L. Bi, Y. Du, H. Zhang, J. Cheng, X. An, Y. Lei, H. Shen, J. Gan, X. Zu, S. Li and L. Qiao, *Nano Energy*, 2020, **67**, 104247.
